# Supplementary material for: Low Ankle-Brachial Index Is Associated With Stroke Recurrence in Ischemic Stroke Patients With Atrial Fibrillation
Source: Frontiers journal article supplement (doi:10.3389/fneur.2021.705904), 2021-10-20
Supplement: Presentation_1.pdf [file Presentation_1.pdf]

## ***Supplementary Material***

**Supplementary Table 1. Distribution of cardioembolic sources in 775 patients with CE.**

| High-risk sources           | <i>n</i> | %    | Medium-risk sources          | <i>n</i> | %    |
|-----------------------------|----------|------|------------------------------|----------|------|
| AF                          | 407      | 76.4 | Patent foramen ovale         | 316      | 40.8 |
| MS with AF                  | 13       | 2.4  | Spontaneous echo contrast    | 119      | 15.4 |
| LA/appendage thrombus       | 55       | 10.3 | Congestive heart failure     | 79       | 10.2 |
| Mechanical prosthetic valve | 23       | 4.3  | Lone AF                      | 7        | 0.9  |
| Dilated cardiomyopathy      | 8        | 1.0  | Hypokinetic LV segment       | 33       | 4.3  |
| Akinetic LV segment         | 9        | 1.2  | MS without AF                | 10       | 1.3  |
| MI within 4 weeks           | 2        | 0.3  | 4 weeks < MI < 6 months      | 0        | 0    |
| Sick sinus syndrome         | 3        | 0.4  | Bioprosthetic heart valve    | 3        | 0.4  |
| LV thrombus                 | 6        | 0.8  | Atrial septal aneurysm       | 11       | 1.4  |
| Infective endocarditis      | 7        | 0.9  | Atrial flutter               | 18       | 2.3  |
| Atrial myxoma               | 0        | 0    | Mitral valve prolapse        | 8        | 1.0  |
|                             |          |      | Nonbacterial endocarditis    | 6        | 0.8  |
|                             |          |      | Mitral annular calcification | 10       | 1.3  |
| Total                       | 533      | 100  | Total                        | 620      | 100  |

Of a total of 775 study patients, patients with more than one source were also included in the cardioembolic source count. AF, atrial fibrillation; CE, cardioembolic stroke; LA, left atrial; LV, left ventricular; MI, myocardial infarction, MS, mitral stenosis.

**Supplementary Table 2. Patient demographic and clinical characteristics.**

|                                                 | Total (n=775)  | Atrial fibrillation |                | <i>p</i> value |
|-------------------------------------------------|----------------|---------------------|----------------|----------------|
|                                                 |                | Yes (n=427)         | No (n=348)     |                |
| Age, y                                          | 65.5±12.7      | 69.5±10.5           | 60.5±13.5      | <0.001         |
| Sex(female)                                     | 333 (43.0)     | 184 (43.1)          | 149 (42.8)     | 0.939          |
| Hypertension                                    | 531 (68.5)     | 309 (72.4)          | 222 (63.8)     | 0.011          |
| Diabetes mellitus                               | 192 (24.8)     | 107 (25.1)          | 85 (24.4)      | 0.839          |
| Hypercholesterolemia                            | 151 (19.5)     | 79 (18.5)           | 72 (20.7)      | 0.444          |
| Current smoking                                 | 149 (19.2)     | 59 (13.8)           | 90 (25.9)      | <0.001         |
| Congestive heart failure                        | 79 (10.2)      | 59 (13.8)           | 20 (5.7)       | <0.001         |
| Vascular disease                                | 401 (51.7)     | 212 (49.6)          | 189 (54.3)     | 0.196          |
| Previous TIA/infarction                         | 105 (13.5)     | 60 (14.1)           | 45 (12.9)      | 0.650          |
| NIHSS score at admission                        | 3.0 [1.0, 9.0] | 5.0 [2.0, 13.0]     | 2.0 [1.0, 5.0] | <0.001         |
| mRS ≥3 at 3 months                              | 155 (20.5)     | 104 (24.7)          | 51 (15.2)      | 0.001          |
| Recurrent stroke                                | 77 (9.9)       | 58 (13.6)           | 19 (5.5)       | <0.001         |
| <b>CHA<sub>2</sub>DS<sub>2</sub>-VASc score</b> |                |                     |                |                |
| Mean±SD                                         | 3.1±1.7        | 3.4±1.7             | 2.7±1.7        | <0.001         |
| Median (IQR)                                    | 3.0 [2.0, 4.0] | 3.0 [1.0, 4.0]      | 3.0 [2.0, 5.0] | <0.001         |
| 0                                               | 42 (5.4)       | 16 (3.7)            | 26 (7.5)       | 0.001          |
| 1                                               | 112 (14.5)     | 48 (11.2)           | 64 (18.4)      |                |
| ≥2                                              | 621 (80.1)     | 363 (85.0)          | 258 (74.1)     |                |
| ABI*                                            | 1.080±0.133    | 1.063±0.151         | 1.100±0.105    | <0.001         |
| Low ABI                                         | 59 (7.6)       | 44 (10.3)           | 15 (4.3)       | 0.002          |

Data are expressed as means ± standard deviations, medians [interquartile ranges], or

numbers (%). \*After obtaining bilateral ABI values, the lower value was used for the analysis. Peripheral artery disease was not considered in the CHA<sub>2</sub>DS<sub>2</sub>-VASc score. ABI, ankle-brachial index; mRS, modified Rankin Scale; NIHSS, National Institutes of Health Stroke Scale; TIA, transient ischemic attack.

**Supplementary Table 3. Mediation analysis for evaluating the mediating effect of low ankle-brachial index between atrial fibrillation and outcomes.**

| <b>Poor short-term outcome</b>    |        |               |                |
|-----------------------------------|--------|---------------|----------------|
| Effect                            | OR     | 95% CI lower  | <i>p</i> value |
| Direct effect                     | 1.7198 | 1.1810–2.5043 | 0.00469        |
| Indirect effect (through low ABI) | 1.0954 | 1.0003–1.1995 | 0.04926        |
| Total effect                      | 1.8838 | 1.2881–2.7550 | 0.00109        |
| Proportion                        | 0.1856 |               |                |
| <b>Stroke recurrence</b>          |        |               |                |
| Effect                            | HR     | 95% CI lower  | <i>p</i> value |
| Direct effect                     | 2.1732 | 1.2870–3.6698 | 0.0037         |
| Indirect effect (through low ABI) | 1.0650 | 0.9832–1.1535 | 0.1224         |
| Total effect                      | 2.3144 | 1.3740–3.8982 | 0.0016         |
| Proportion                        | 0.1074 |               |                |
| <b>MACE</b>                       |        |               |                |
| Effect                            | HR     | 95% CI lower  | <i>p</i> value |
| Direct effect                     | 1.5382 | 1.1317–2.0908 | 0.00596        |
| Indirect effect (through low ABI) | 1.0774 | 1.0106–1.1486 | 0.02242        |
| Total effect                      | 1.6573 | 1.2189–2.2533 | 0.00127        |

Proportion 0.1812

| Mortality                         |        |               |                |
|-----------------------------------|--------|---------------|----------------|
| Effect                            | HR     | 95% CI lower  | <i>p</i> value |
| Direct effect                     | 1.6318 | 1.1598–2.2958 | 0.00494        |
| Indirect effect (through low ABI) | 1.0904 | 1.0119–1.1751 | 0.02320        |
| Total effect                      | 1.7793 | 1.2634–2.5059 | 0.00097        |
| Proportion                        | 0.1894 |               |                |

CI, confidence interval; HR, hazard ratio; MACE, major adverse cardiovascular event; OR, odds ratio.

**Supplementary Table 4. Mediation analysis for evaluating the mediating effect of ankle-brachial index between atrial fibrillation and outcomes.**

| <b>Stroke recurrence</b>      |        |               |                |
|-------------------------------|--------|---------------|----------------|
| Effect                        | HR     | 95% CI lower  | <i>p</i> value |
| Direct effect                 | 2.1409 | 1.2679–3.6152 | 0.0044         |
| Indirect effect (through ABI) | 1.0779 | 1.0112–1.1491 | 0.0214         |
| Total effect                  | 2.3078 | 1.3740–3.8982 | 0.0017         |
| Proportion                    | 0.1276 |               |                |
| <b>MACE</b>                   |        |               |                |
| Effect                        | HR     | 95% CI lower  | <i>p</i> value |
| Direct effect                 | 1.5268 | 1.1232–2.0755 | 0.0069         |
| Indirect effect (through ABI) | 1.0772 | 1.0257–1.1312 | 0.0029         |
| Total effect                  | 1.6446 | 1.2106–2.2343 | 0.0015         |
| Proportion                    | 0.1828 |               |                |
| <b>Mortality</b>              |        |               |                |
| Effect                        | HR     | 95% CI lower  | <i>p</i> value |
| Direct effect                 | 1.6049 | 1.1401–2.2592 | 0.0067         |
| Indirect effect (through ABI) | 1.0921 | 1.0328–1.1549 | 0.0020         |
| Total effect                  | 1.7528 | 1.2456–2.4665 | 0.0013         |
| Proportion                    | 0.1964 |               |                |

CI, confidence interval; HR, hazard ratio; MACE, major adverse cardiovascular event.

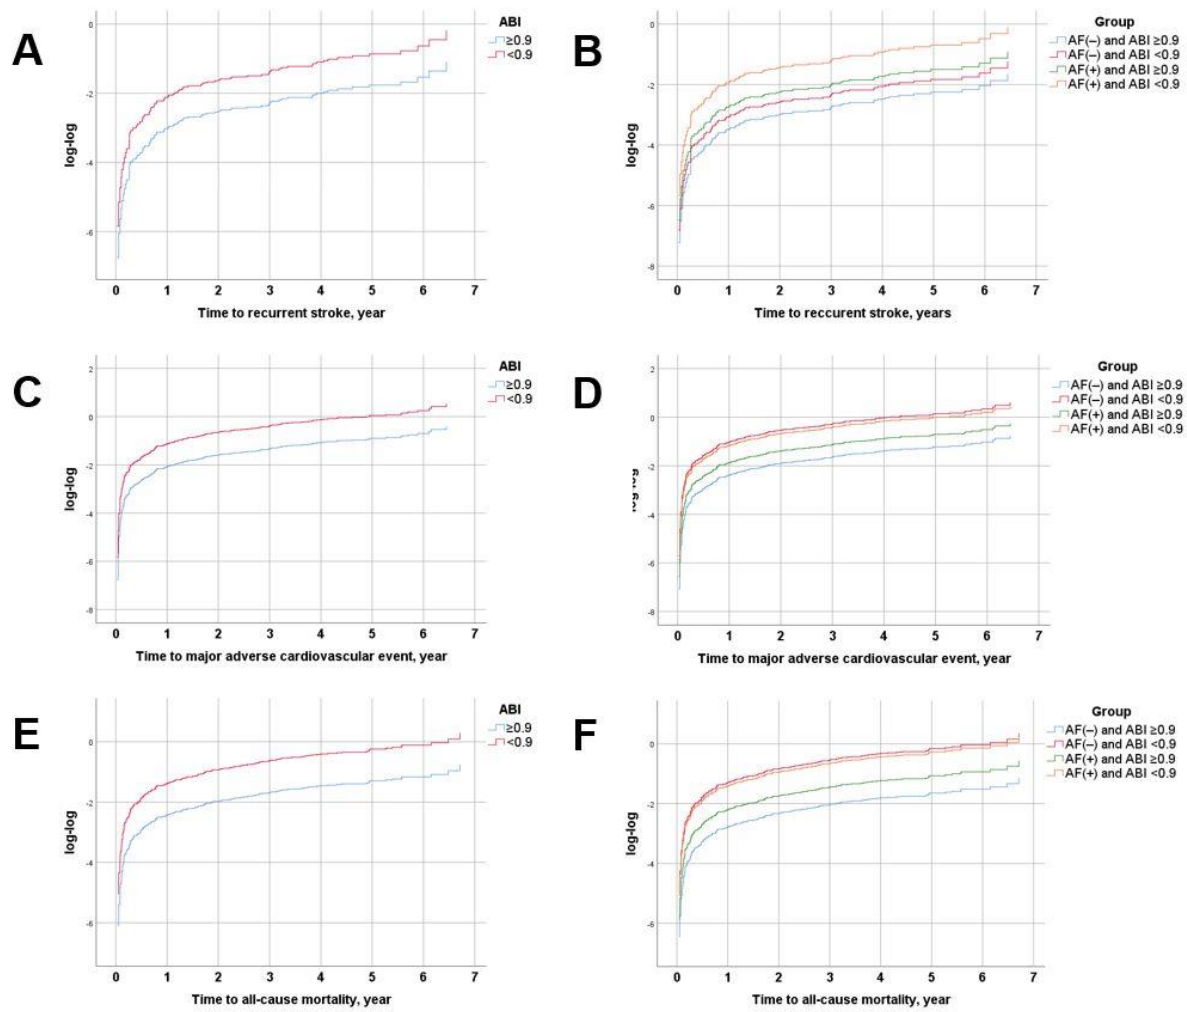

**Supplementary Figure 1. Log-log plots for recurrent stroke (A, B), major adverse cardiovascular events (C, D), and all-cause mortality (E, F). ABI, ankle-brachial index; AF, atrial fibrillation.**

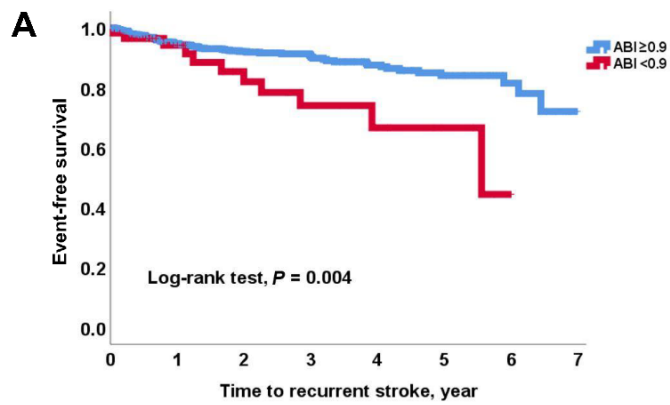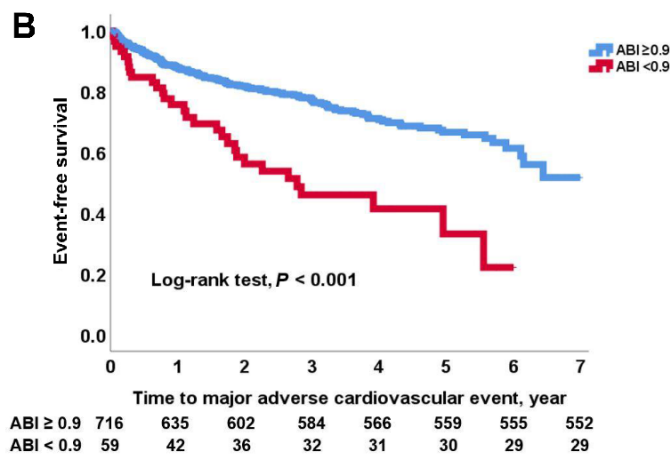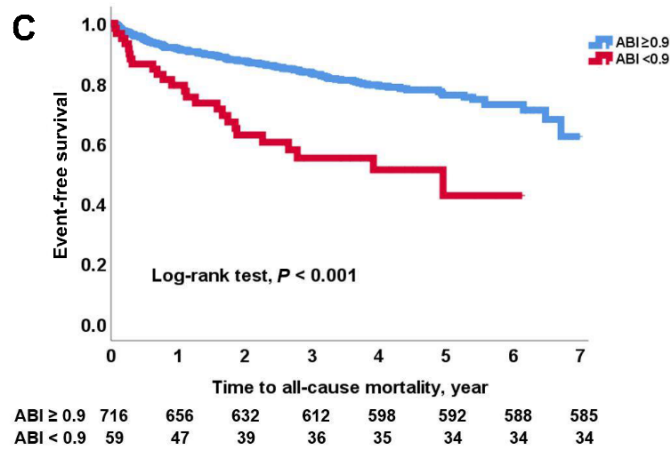

**Supplementary Figure 2. Kaplan–Meier survival analysis for (A) recurrent stroke, (B) major adverse cardiovascular events, and (C) all-cause mortality according to ABI  $< 0.9$ . ABI, ankle-brachial index.**
